# Supplementary material
Source: PubMed Central journal article supplement (PMC5526327)
Supplement: NIHMS867852-supplement-Appendix.pdf [file NIHMS867852-supplement-Appendix.pdf]

## Supplementary appendix

This appendix formed part of the original submission and has been peer reviewed. We post it as supplied by the authors.

Supplement to: Dheda K, Gumbo T, Gandhi NR, et al. Global control of tuberculosis: from extensively drug-resistant to untreatable tuberculosis. *Lancet Respir Med* 2014; published online March 24. [http://dx.doi.org/10.1016/S2213-2600\(14\)70031-1](http://dx.doi.org/10.1016/S2213-2600(14)70031-1).

## **ONLINE SUPPLEMENT**

### **SUPER-BUGS THREATEN GLOBAL TB CONTROL: FROM EXTENSIVELY DRUG-RESISTANT (XDR-TB) TO UNTREATABLE TUBERCULOSIS – STATE OF THE ART**

Keertan Dheda<sup>1,2</sup>, Tawanda Gumbo<sup>3</sup>, Neel R Gandhi<sup>4</sup>, Megan Murray<sup>5</sup>, Grant Theron<sup>1</sup>, Zarir Uwadia<sup>6</sup>, GB Migliori<sup>7</sup>, Rob Warren<sup>8</sup>

<sup>1</sup>Lung Infection and Immunity Unit, Division of Pulmonology & UCT Lung Institute, Department of Medicine, University of Cape Town, Cape Town, South Africa.

<sup>2</sup>Institute of Infectious Diseases and Molecular Medicine, University of Cape Town, Cape Town, South Africa.

<sup>3</sup>Office of Global Health and the Department of Medicine, University of Texas Southwestern Medical Center, Dallas, Texas

<sup>4</sup>Departments of Epidemiology, Global Health and Infectious Diseases, Rollins School of Public Health, Emory University, Atlanta, Georgia, USA

<sup>5</sup>Department of Global Health and Social Medicine, Harvard Medical School

<sup>6</sup>Hinduja Hospital & Research Center, Mumbai, India.

<sup>7</sup>Director, WHO Collaborating Centre for TB and Lung Diseases, Fondazione S. Maugeri, Care and Research Institute, Tradate, Italy

<sup>8</sup>DST/NRF Centre of Excellence for Biomedical Tuberculosis Research, MRC Centre for Molecular and Cellular Biology, Division of Molecular Biology and Human Genetics, Department of Biomedical Sciences, Faculty of Medicine and Health Sciences, Stellenbosch University, Tygerberg, South Africa.

**Request for reprints and correspondence:** Keertan Dheda, H47 Old Main Building, Groote Schuur Hospital, Observatory, 7925, South Africa or [keertan.dheda@uct.ac.za](mailto:keertan.dheda@uct.ac.za)

## **Molecular epidemiology of XDR and TDR tuberculosis**

Intensive longitudinal studies have demonstrated that treatment in the absence of routine drug susceptibility testing was the underlying cause of the emergence of XDR-TB in different settings in South Africa <sup>1,2</sup>. This in turn was exacerbated by the implementation of the WHO-recommended standardised MDR treatment regimen, which failed to recognise the association between ethambutol <sup>3,4</sup>, pyrazinamide <sup>5,6</sup> and ethionamide resistance <sup>7</sup> and MDR-TB. These programmatic errors have led to the selection of distinct XDR-TB strain genotypes in the different South African provinces <sup>8-11</sup> and in Portugal <sup>12</sup>. Subsequent to the emergence of XDR-TB, these strains were transmitted in settings where diagnostic delay prevents the implementation of effective treatment and where infection control measures are inadequate <sup>13</sup>. The theme of the emergence of XDR-TB followed by transmission was common to most of the countries where molecular epidemiological studies have been done (Table 1E). Nevertheless, a number of studies reported that XDR-TB was primarily acquired, possibly reflecting failure of the current policies and protocols to initially test and treat, and cure cases adequately (Table 1E). Despite improving our understanding of the mechanisms driving the XDR-TB epidemic in the respective countries, it is not clear whether this information has influenced TB control policy, except in KwaZulu-Natal <sup>14</sup>.

## **XDR-TB and resistance beyond XDR-TB in India and China**

MDR-TB has been reported from every country in the world surveyed with a recent WHO study reporting that global rates of MDR-TB are currently at their highest <sup>15</sup>. 36% of the world's total population and 50% of the world's MDR-TB population reside in China and India and hence this section will focus on these two vast countries (see Table 3 in the main paper summarizing the disease burden and outcomes).

**China:** Estimates of the extent of drug resistance in China were limited in the past by local or regional surveys not truly representative of such a vast country. In 2012 the Chinese Center for Disease Control and Prevention (CDC) conducted a national survey of DR-TB in 2012 by sampling 70 clusters nationwide (4606 patients) with all the provinces contributing at least one cluster <sup>16</sup>. 5.7% of newly diagnosed and 25.6% of previously treated patients had MDR-TB. Among those with MDR-TB, 8.3% of new cases (95% CI, 2.9 to 13.6) and 8.0% of previously treated patients (95% CI, 2.2 to 13.9) had XDR-TB. This translates into ~120,000 MDR and ~10,000 XDR-TB cases per year in China, confirming the severity of China's MDR-TB problem. The Ministry of Health responded to these alarming figures by strengthening the reporting, referral, and follow up of patients seen in the hospital system.

**India:** In India, the situation is less clear because of the lack of national surveillance data and "official" figures are at variance with estimates in the private sector. In the latest WHO global resistance report, MDR-TB rates were reported at 2-3% in new cases and 12-17% in retreatment cases <sup>17</sup>. However, these estimates are based on small sample sizes and come from sentinel centers where program performance may exceed what is routinely encountered elsewhere. For example, at a private referral hospital in Mumbai, the corresponding MDR-TB rates for new and retreatment cases run at 30% and 60% <sup>18</sup>. The WHO report reveals that XDR-TB prevalence rates amongst retreatment cases is ~0.5%, yet in the first report of XDR-TB from Mumbai in 2006, 11% of all MDR samples sent to a private mycobacterial laboratory were XDR-TB <sup>19</sup>. Recently, a study from a tertiary private hospital in Mumbai attracted intense global attention documenting the first four Indian patients whose isolates were resistant to all drugs tested (TDR-TB) <sup>20</sup>. Several factors including inappropriate treatment may underpin the emergence of DR-TB in this setting. In the public sector category 1 (2HREZ/4RH) treatment failures,

instead of receiving DST and an appropriate regimen, were until recently inappropriately put on category 2 (2HREZS/1HREZ/5HRE) treatment for a further 8 months, which in essence adds a single new drug (streptomycin) to a clearly failing regimen. In India's huge and unregulated private sector (70% of hospitals and 76% of doctors) Second line drugs have been used inappropriately over the last two decades by a wide range of non-specialists without any government control. A recent audit of the MDR-TB prescriptions written out by 106 private doctors practicing in Dharavi, Asia's largest slum, revealed that 97% of all prescribed regimens were so inadequate that amplification of MDR to XDR-TB was highly likely <sup>21</sup>. Typical of many resource-poor settings including Africa, infrastructure, patient isolation, and infection control measures are severely lacking (Figure 2 is typical of a congregate ward setting in which patients reside).

Table 1E. Transmission dynamics and genotyping data from XDR-TB from different geographical regions.

| Continent | Country      | Region                                                | Study period                                                                                                                                        | Number of XDR cases | Number of TDR cases | Genotyping method(s) used       | Genotypes present                                                                                                                                                                                                            | Number of isolates                                                                  | % Clustering (transmission) | Interpretation of results                                                                                                         | Data used to construct Figure 1 | Reference |
|-----------|--------------|-------------------------------------------------------|-----------------------------------------------------------------------------------------------------------------------------------------------------|---------------------|---------------------|---------------------------------|------------------------------------------------------------------------------------------------------------------------------------------------------------------------------------------------------------------------------|-------------------------------------------------------------------------------------|-----------------------------|-----------------------------------------------------------------------------------------------------------------------------------|---------------------------------|-----------|
| Africa    | South Africa | Gauteng, Limpopo, Mpumalanga and North West           | June 2007 to January 2008                                                                                                                           | 24                  |                     | Spoligotyping, MIRU-VNTR typing | Beijing<br>LAM<br>T<br>EAI<br>S<br>X<br>H                                                                                                                                                                                    | 6<br>3<br>3<br>6<br>2<br>3<br>1                                                     | N/A                         | XDR-TB is endemic in the region and only low levels of transmission were observed                                                 | Yes                             | A1        |
| Africa    | South Africa | Western Cape, Eastern Cape, KwaZulu-Natal and Gauteng | August 2000-2010 (Western Cape), July 2008-November 2009 (Eastern Cape), KwaZulu-Natal (May 2005-April 2006) and Gauteng (March 2004-December 2007) | 224                 |                     | Spoligotyping                   | <b>Western Cape</b><br>Beijing (typical)<br>Beijing (atypical)<br>LAM<br>T<br>U<br>X<br>Orphan<br><br><b>Eastern Cape</b><br>Beijing (atypical)<br>LAM<br>S<br>Orphan<br><br><b>KwaZulu-Natal</b><br>LAM<br>T<br>S<br>Orphan | 37<br>57<br>2<br>5<br>1<br>1<br>2<br><br>89<br>1<br>1<br>3<br><br>18<br>2<br>2<br>3 | N/A                         | Endemic spread of MDR-TB or pre-XDR followed by acquisition of resistance to generate XDR-TB. Additional spread through migration | Yes                             | A2        |

|        |              |                                                                                     |                               |    |  |                                                       |                                                     |                                        |             |                                                                                                             |    |    |
|--------|--------------|-------------------------------------------------------------------------------------|-------------------------------|----|--|-------------------------------------------------------|-----------------------------------------------------|----------------------------------------|-------------|-------------------------------------------------------------------------------------------------------------|----|----|
| Africa | South Africa | North West (gold mine)                                                              | January 2003 to November 2005 | 5  |  | IS6110 DNA fingerprinting, Spoligotyping, MIRU typing | LAM<br>X<br>H                                       | 1<br>3<br>1                            | 0/5 (0%)    | Amplification of resistance due to diagnostic delay and inappropriate treatment                             | No | A3 |
| Africa | South Africa | KwaZulu-Natal                                                                       | N/A                           | 9  |  | Whole genome sequencing                               | LAM                                                 | 9                                      | 9/9 (100%)  | Clonal transmission of XDR-TB                                                                               | No | A4 |
| Africa | South Africa | KwaZulu-Natal                                                                       | June 2005 to June 2006        | 14 |  | Spoligotyping                                         | N/A                                                 | N/A                                    | N/A         | Reinfection with XDR-TB strains indicating transmission of XDR-TB                                           | No | A5 |
| Africa | South Africa | Gauteng, Limpopo, Mpumalanga, North West, Eastern Cape, Western Cape and Free State | June 2005 to December 2006    | 41 |  | Spoligotyping                                         | Beijing<br>LAM<br>T<br>EAI<br>X<br>H<br>S<br>Orphan | 14<br>5<br>4<br>4<br>1<br>2<br>1<br>10 | 15/41 (37%) | XDR-TB was endemic in all regions tested. Transmission was low implying acquisition of resistance           | No | A6 |
| Africa | South Africa | KwaZulu-Natal                                                                       | January 2005 to March 2006    | 46 |  | Spoligotyping                                         | LAM (not defined)                                   | 39<br>7                                | N/A         | Extensive transmission of XDR-TB                                                                            | No | A7 |
| Africa | South Africa | Western Cape                                                                        | August 2002 to February 2008  | 52 |  | IS6110 DNA fingerprinting, targeted DNA sequencing    | Beijing<br>LAM<br>S<br>X                            | 45<br>1<br>1<br>5                      | 19%         | Transmission of MDR-TB followed by acquisition of second-line resistance leading to the emergence of XDR-TB | No | A8 |

|          |              |                                             |                               |     |   |                                                                   |                                             |                         |              |                                                                                                                   |     |     |
|----------|--------------|---------------------------------------------|-------------------------------|-----|---|-------------------------------------------------------------------|---------------------------------------------|-------------------------|--------------|-------------------------------------------------------------------------------------------------------------------|-----|-----|
| Africa   | South Africa | Western Cape                                | N/A                           | 4   |   | Whole genome sequencing                                           | N/A                                         | N/A                     | N/A          | Transmission of MDR-TB followed by acquisition of second-line resistance leading to the emergence of XDR-TB       | No  | A9  |
| Africa   | South Africa | Eastern Cape                                | July 2008 to July 2009        | 108 | 9 | IS6110 DNA fingerprinting, spoligotyping, targeted DNA sequencing | Beijing (atypical)<br>LAM<br>MANU<br>S<br>T | 103<br>2<br>1<br>1<br>1 | 88/108 (81%) | Endemic spread of pre-XDR-TB followed by acquisition of resistance to generate XDR-TB and subsequent transmission | No  | A10 |
| Africa   | Ethiopia     | Addis Ababa                                 | December 2005 to August 2006  | 2   |   | spoligotyping                                                     | T                                           | 2                       | N/A          | XDR-TB was emerging                                                                                               | Yes | A11 |
| Americas | Argentina    | Salta, Rosario, Buenos Aires, Mar del Plata | January 2003 to December 2009 | 53  |   | IS6110 DNA fingerprinting, spoligotyping                          | LAM<br>T<br>H<br>Orphan                     | 8<br>2<br>21<br>22      | 31/53 (58%)  | XDR-TB was emerging and being transmitted                                                                         | Yes | A12 |
| Asia     | Nepal        | Country-wide                                | 2007 to 2010                  | 13  |   | Spoligotyping, VNTR typing                                        | Beijing<br>CAS<br>T<br>Orphan               | 9<br>1<br>2<br>1        | 4/13 (31%)   | XDR-TB was emerging and being transmitted                                                                         | Yes | A13 |
| Asia     | China        | Hong Kong                                   | 1997 to 2006                  | 20  |   | IS6110 DNA fingerprinting                                         | N/A                                         | N/A                     | 13/20 (65%)  | Community transmission of XDR-TB                                                                                  | No  | A14 |
| Asia     | China        | Xinjiang province, Shihezi                  |                               | 2   |   | MIRU-VNTR typing                                                  | N/A                                         | N/A                     | N/A          | Not described                                                                                                     | Yes | A15 |



|      |          |              |                               |                                                            |  |                                           |                                                |                                   |            |                                                                                        |     |     |
|------|----------|--------------|-------------------------------|------------------------------------------------------------|--|-------------------------------------------|------------------------------------------------|-----------------------------------|------------|----------------------------------------------------------------------------------------|-----|-----|
| Asia | China    | Jiangxi      | January 2010 to June 2011     | 16                                                         |  | MIRU-VNTR typing, DNA sequencing          | N/A                                            | N/A                               | 0/16 (0%)  | XDR-TB was emerging through acquisition of resistance                                  | No  | A16 |
| Asia | China    | Shanghai     | March 2004 to November 2007   | 11                                                         |  | VNTR typing                               | Beijing orphan                                 | 10<br>1                           | 8/11 (73%) | XDR-TB was primarily transmitted                                                       | Yes | A17 |
| Asia | China    | Country wide | January 2002 to December 2005 | 13                                                         |  | MIRU-VNTR typing, targeted DNA sequencing | Beijing T                                      | 10<br>3                           | 2/13 (15%) | XDR-TB was emerging through acquisition of resistance followed by limited transmission | Yes | A18 |
| Asia | Cambodia | Not given    | May 2007 and June 2009        | 1                                                          |  | Spoligotyping, targeted DNA sequencing    | EAI                                            | 1                                 | N/A        | Not described                                                                          | Yes | A19 |
| Asia | Pakistan | Country wide | 2006 to 2009                  | 57                                                         |  | Spoligotyping, MIRU-VNTR typing           | Beijing<br>CAS<br>T<br>EAI<br>U<br>X<br>Orphan | 5<br>33<br>4<br>1<br>2<br>1<br>11 | 0/57 (0%)  | XDR-TB was emerging through acquisition of resistance                                  | Yes | A20 |
| Asia | Pakistan | Country wide | 2006 to 2009                  | 50<br>(previously described isolates Hasan <i>et al.</i> ) |  | Spoligotyping, targeted DNA sequencing    | N/A                                            | N/A                               | N/A        | N/A                                                                                    | No  | A21 |
| Asia | Taiwan   | Country wide | May 2007 to Dec 2008          | 43                                                         |  | Spoligotyping                             | Beijing<br>LAM<br>T<br>EAI<br>H<br>Orphan      | 22<br>2<br>1<br>8<br>2<br>8       | N/A        | Not described                                                                          | Yes | A22 |

|             |          |                                       |                              |     |    |                                                       |                                              |                                |              |                                                                                           |     |     |
|-------------|----------|---------------------------------------|------------------------------|-----|----|-------------------------------------------------------|----------------------------------------------|--------------------------------|--------------|-------------------------------------------------------------------------------------------|-----|-----|
| Asia        | India    | Mumbai                                | January 28 to March 2009     | 150 |    | Spoligotyping, targeted DNA sequencing                | Beijing<br>CAS<br>T<br>EAI<br>H<br>Family 35 | 94<br>21<br>20<br>13<br>1<br>1 | 93/150 (62%) | XDR-TB was emerging and being transmitted                                                 | Yes | A23 |
| Asia        | Japan    | Osaka                                 | April 2000 to March 2007     | 36  |    | MIRU-VNTR typing                                      | N/A                                          | N/A                            | N/A          | Not described                                                                             | No  | A24 |
| Asia        | Japan    | Country wide (drug resistance survey) | June 2002 and November 2002  | 17  |    | IS6110 DNA fingerprinting, spoligotyping, VNTR typing | Beijing<br>LAM<br>T<br>Orphan                | 8<br>3<br>2<br>4               | 12/17 (57%)  | XDR-TB was emerging and being transmitted                                                 | Yes | A25 |
| Asia        | Japan    | Osaka                                 | 2001 to 2004                 | 29  |    | IS6110 DNA fingerprinting, MIRU-VNTR typing           | N/A                                          | N/A                            | 20/29 (69%)  | XDR-TB was emerging and being transmitted                                                 | No  | A26 |
| Middle East | Iran     | Tehran                                | October 2006 to October 2008 | 8   | 15 | Spoligotyping and VNTR typing                         | Beijing<br>CAS<br>EAI<br>H                   | 5<br>4<br>5<br>9               | 0/23 (0%)    | XDR-TB was emerging through acquisition of resistance                                     | Yes | A27 |
| Middle East | Iran     | Country wide (drug resistance survey) | January 2003 to January 2005 | 12  |    | IS6110 DNA fingerprinting, spoligotyping              | EAI<br>H                                     | 4<br>8                         | 12/12 (100%) | XDR-TB transmission was identified in known contacts                                      | Yes | A28 |
| Europe      | France   | Marseilles                            | Case report                  | 1   |    | Targeted DNA sequencing                               | N/A                                          | N/A                            | N/A          | Previously treated in Russia prior to being diagnosed with XDR-TB in France (Immigration) | No  | A29 |
| Europe      | Portugal | Lisbon                                | 1997 and 2009                | 30  |    | MIRU-VNTR typing                                      | LAM                                          | 30                             | 30/30 (100)  | On-going transmission of XDR-TB                                                           | No  | A30 |
| Europe      | Portugal | Lisbon                                | 2001 to 2006                 | 57  |    | MIRU-VNTR typing                                      | LAM                                          | 57                             | N/A          | On-going transmission of XDR-TB                                                           | Yes | A31 |

|        |          |                        |              |    |           |                                    |                                  |                        |                 |                                           |     |     |
|--------|----------|------------------------|--------------|----|-----------|------------------------------------|----------------------------------|------------------------|-----------------|-------------------------------------------|-----|-----|
| Europe | Portugal | Lisbon                 | 2005         | 26 |           | MIRU-VNTR                          | LAM                              | 26                     | 73% (new cases) | On-going transmission of XDR-TB           | No  | A32 |
| Europe | Poland   | Drug Resistance Survey | 1997 to 2004 | 1  |           | Spoligotyping                      | N/A                              | N/A                    | N/A             | Not described                             | No  | A33 |
| Europe | Poland   | Drug Resistance Survey | 2000 to 2008 | 18 | 1 pre-TDR | Spoligotyping and MIRU-VNTR typing | Beijing<br>T<br>U<br>H<br>Orphan | 2<br>12<br>1<br>2<br>2 | 10/19 (53%)     | XDR-TB was emerging and being transmitted | Yes | A34 |

REFERENCES FOR TABLE 2

A1 <sup>10</sup>, A2 <sup>8</sup>, A3 <sup>1</sup>, A4 <sup>22</sup>, A5 <sup>23</sup>, A6 <sup>9</sup>, A7 <sup>24</sup>, A8 <sup>25</sup>, A9 <sup>26</sup>, A10 <sup>27</sup>, A11 <sup>28</sup>, A12 <sup>29</sup>, A13 <sup>30</sup>, A14 <sup>31</sup>, A15 <sup>32</sup>, A16 <sup>33</sup>, A17 <sup>34</sup>, A18 <sup>35</sup>, A19 <sup>36</sup>, A20 <sup>37</sup>, A21 <sup>38</sup>, A22 <sup>39</sup>, A23 <sup>40</sup>, A24 <sup>41</sup>, A25 <sup>42</sup>, A26 <sup>43</sup>, A27 <sup>44</sup>, A28 <sup>45</sup>, A29 <sup>46</sup>, A30 <sup>47</sup>, A31 <sup>48</sup>, A32 <sup>12</sup>, A33 <sup>49</sup>, A34 <sup>50</sup>

**Figure 1.** Global distribution of XDR-TB genotypes overlaid onto the WHO map of the 84 countries which have reported XDR-TB cases<sup>51</sup>. The colour specific segments in each of the pie charts reflect the proportion of isolates with a defined genotype for each country or region: South Africa<sup>8, 10</sup>, Ethiopia<sup>28</sup>, Argentina<sup>29</sup>, Portugal<sup>47</sup>, Poland<sup>50</sup>, Iran<sup>44, 45</sup>, Pakistan<sup>37</sup>, India<sup>40</sup>, Nepal<sup>30</sup>, Cambodia<sup>36</sup>, China<sup>33-35</sup>, Taiwan<sup>39</sup>, Japan<sup>42</sup> (Table 2). Beijing genotype strains from South Africa were sub-classified as typical and atypical to demonstrate regional differences in the population structure of XDR-TB.

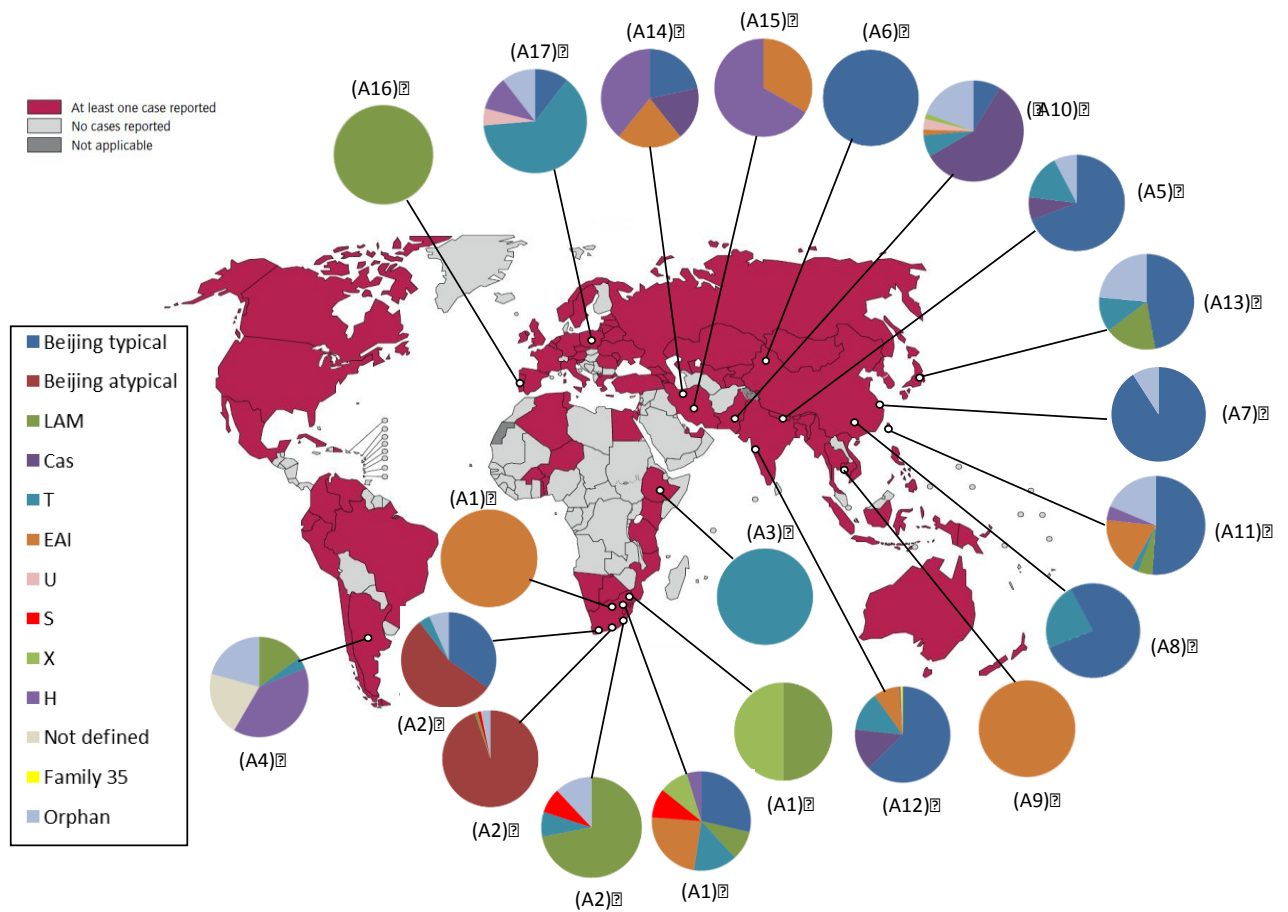

A1<sup>10</sup>, A2<sup>8</sup>, A3<sup>28</sup>, A4<sup>29</sup>, A5<sup>30</sup>, A6<sup>32</sup>, A7<sup>34</sup>, A8<sup>35</sup>, A9<sup>36</sup>, A10<sup>37</sup>, A11<sup>39</sup>, A12<sup>40</sup>, A13<sup>42</sup>, A14<sup>44</sup>, A15<sup>45</sup>, A16<sup>48</sup>, A17<sup>50</sup>

**Table: Comparison of the disease burden and outcomes between the global TB super-powers**

|                                      | <b>India</b> | <b>China</b> |
|--------------------------------------|--------------|--------------|
| Population                           | 1241 million | 1348 million |
| TB prevalence                        | 3,100,000    | 1,400,000    |
| TB incidence                         | 2,200,000    | 1,000,000    |
| TB mortality                         | 300,000      | 47,000       |
| Total MDR-TB                         | 66,000       | 61,000       |
| MDR rate in new cases                | 1.7%         | 5.66%        |
| MDR rate in previously treated cases | 14.7%        | 25.6%        |

Source: Global Tuberculosis Report 2012: WHO.<sup>1</sup>

## REFERENCES

1. Calver AD, Falmer AA, Murray M, Strauss OJ, Streicher EM, Hanekom M, et al. Emergence of increased resistance and extensively drug-resistant tuberculosis despite treatment adherence, South Africa. *Emerg Infect Dis.* 2010; **16**(2): 264-71.
2. Pillay M, Sturm A. Evolution of the extensively drug-resistant F15/LAM4/KZN strain of *Mycobacterium tuberculosis* in KwaZulu-Natal, South Africa. *Clin Infect Dis.* 2007; **45**(11): 1409-14.
3. Hoek KG, Schaaf HS, Gey van Pittius NC, van Helden PD, Warren RM. Resistance to pyrazinamide and ethambutol compromises MDR/XDR-TB treatment. *S Afr Med J.* 2009; **99**(11): 785-7.
4. Johnson R, Jordaan AM, Pretorius L, Engelke E, van der Spuy G, Kewley C, et al. Ethambutol resistance testing by mutation detection. *Int J Tuberc Lung Dis.* 2006; **10**(1): 68-73.
5. Louw GE, Warren RM, Donald PR, Murray MB, Bosman M, Van Helden PD, et al. Frequency and implications of pyrazinamide resistance in managing previously treated tuberculosis patients. *Int J Tuberc Lung Dis.* 2006; **10**(7): 802-7.
6. Mphahlele M, Syre H, Valvatne H, Stavrum R, Mannsaker T, Muthivhi T, et al. Pyrazinamide resistance among South African multidrug-resistant *Mycobacterium tuberculosis* isolates. *J Clin Microbiol.* 2008; **46**(10): 3459-64.
7. Muller B, Streicher EM, Hoek KG, Tait M, Trollip A, Bosman ME, et al. *inhA* promoter mutations: a gateway to extensively drug-resistant tuberculosis in South Africa? *Int J Tuberc Lung Dis.* 2011; **15**(3): 344-51.
8. Chihota VN, Muller B, Mlambo CK, Pillay M, Tait M, Streicher EM, et al. Population structure of multi- and extensively drug-resistant *Mycobacterium tuberculosis* strains in South Africa. *J Clin Microbiol.* 2012; **50**(3): 995-1002.

9. Mlambo CK, Warren RM, Poswa X, Victor TC, Duse AG, Marais E. Genotypic diversity of extensively drug-resistant tuberculosis (XDR-TB) in South Africa. *Int J Tuberc Lung Dis.* 2008; **12**(1): 99-104.
10. Said HM, Kock MM, Ismail NA, Mphahlele M, Baba K, Omar SV, et al. Molecular characterization and second-line antituberculosis drug resistance patterns of multidrug-resistant *Mycobacterium tuberculosis* isolates from the northern region of South Africa. *J Clin Microbiol.* 2012; **50**(9): 2857-62.
11. Streicher EM, Muller B, Chihota V, Mlambo C, Tait M, Pillay M, et al. Emergence and treatment of multidrug resistant (MDR) and extensively drug-resistant (XDR) tuberculosis in South Africa. *Infection, genetics and evolution : journal of molecular epidemiology and evolutionary genetics in infectious diseases.* 2012; **12**(4): 686-94.
12. Perdigao J, Macedo R, Malaquias A, Ferreira A, Brum L, Portugal I. Genetic analysis of extensively drug-resistant *Mycobacterium tuberculosis* strains in Lisbon, Portugal. *J Antimicrob Chemother.* 2010; **65**(2): 224-7.
13. Van Rie A, Enarson D. XDR tuberculosis: an indicator of public-health negligence. *Lancet.* 2006; **368**(9547): 1554-6.
14. Lim JR MT, Mlisana K, Moodley J, Ramdin N, Margot B, Brust JCM, Ismail N, Rustomjee R, Gandhi N, Shah NS. Incidence and geographic distribution of extensively drug-resistant tuberculosis in KwaZulu-Natal Province, South Africa. . Poster presentation at ID Week 2012, San Diego 2012. p. Available at <https://idsa.confex.com/idsa/2012/webprogram/Paper34734.html>
15. Zignol M, van Gemert W, Falzon D, Sismanidis C, Glaziou P, Floyd K, et al. Surveillance of anti-tuberculosis drug resistance in the world: an updated analysis, 2007-2010. *Bull World Health Organ.* 2012; **90**(2): 111-9D.
16. Zhao Y, Xu S, Wang L, Chin DP, Wang S, Jiang G, et al. National survey of drug-resistant tuberculosis in China. *N Engl J Med.* 2012; **366**(23): 2161-70.

17. WHO. Global Tuberculosis Report 2012. Available at [http://apps.who.int/iris/bitstream/10665/75938/1/9789241564502\\_eng.pdf](http://apps.who.int/iris/bitstream/10665/75938/1/9789241564502_eng.pdf) Accessed 12-10-2012 2012.
18. Rodrigues C, Shenai S, Sadani M, Thakkar P, Sodha A, Udhwadia ZF, et al. Multidrug-resistant tuberculosis in Mumbai: it's only getting worse. *Int J Tuberc Lung Dis.* 2006; **10**(12): 1421-2.
19. Jain S, Rodrigues C, Mehta A, Udhwadia ZF. High Prevalence of XDR-TB from a tertiary care hospital in India. . Proceedings of the American Thoracic Society International Conference; 2007; San Francisco, USA; 2007. p. A510.
20. Udhwadia ZF, Amale RA, Ajbani KK, Rodrigues C. Totally drug-resistant tuberculosis in India. *Clin Infect Dis.* 2012; **54**(4): 579-81.
21. Udhwadia ZF, Pinto LM, Uplekar MW. Tuberculosis management by private practitioners in Mumbai, India: has anything changed in two decades? *PLoS One.* 2010; **5**(8): e12023.
22. Ioerger TR, Koo S, No EG, Chen X, Larsen MH, Jacobs WR, Jr., et al. Genome analysis of multi- and extensively-drug-resistant tuberculosis from KwaZulu-Natal, South Africa. *PLoS ONE.* 2009; **4**(11): e7778.
23. Andrews JR, Gandhi NR, Moodley P, Shah NS, Bohlken L, Moll AP, et al. Exogenous reinfection as a cause of multidrug-resistant and extensively drug-resistant tuberculosis in rural South Africa. *J Infect Dis.* 2008; **198**(11): 1582-9.
24. Gandhi NR, Moll A, Sturm AW, Pawinski R, Govender T, Lalloo U, et al. Extensively drug-resistant tuberculosis as a cause of death in patients co-infected with tuberculosis and HIV in a rural area of South Africa. *Lancet.* 2006; **368**(9547): 1575-80.
25. Dheda K, Shean K, Zumla A, Badri M, Streicher EM, Page-Shipp L, et al. Early treatment outcomes and HIV status of patients with extensively drug-resistant tuberculosis in South Africa: a retrospective cohort study. *Lancet.* 2010; **375**(9728): 1798-807.



26. Ioerger TR, Feng Y, Chen X, Dobos KM, Victor TC, Streicher EM, et al. The non-clonality of drug resistance in Beijing-genotype isolates of *Mycobacterium tuberculosis* from the Western Cape of South Africa. *BMC genomics*. 2010; **11**: 670.
27. Klopper M, Warren RM, Hayes C, Gey van Pittius NC, Streicher EM, Muller B, et al. Emergence and spread of extensively and totally drug-resistant tuberculosis, South Africa. *Emerg Infect Dis*. 2013; **19**(3): 449-55.
28. Agonafir M, Lemma E, Wolde-Meskel D, Goshu S, Santhanam A, Girmachew F, et al. Phenotypic and genotypic analysis of multidrug-resistant tuberculosis in Ethiopia. *Int J Tuberc Lung Dis*. 2010; **14**(10): 1259-65.
29. Ritacco V, Lopez B, Ambroggi M, Palmero D, Salvadores B, Gravina E, et al. HIV infection and geographically bound transmission of drug-resistant tuberculosis, Argentina. *Emerg Infect Dis*. 2012; **18**(11): 1802-10.
30. Poudel A, Maharjan B, Nakajima C, Fukushima Y, Pandey BD, Beneke A, et al. Characterization of extensively drug-resistant *Mycobacterium tuberculosis* in Nepal. *Tuberculosis (Edinb)*. 2013; **93**(1): 84-8.
31. Leung EC, Leung CC, Kam KM, Yew WW, Chang KC, Leung WM, et al. Transmission of multidrug-resistant and extensively drug-resistant tuberculosis in a metropolitan city. *Eur Respir J*. 2013; **41**(4): 901-8.
32. Zhang J, L. Mi, Y. Wang, P. Liu, H. Liang, Y. Huang, B. Lv, and L. Yuan. Genotypes and drug susceptibility of *Mycobacterium tuberculosis* Isolates in Shihezi, Xinjiang Province, China. . *BMCResNotes*. 2012; **5**: 309.
33. Yuan X, T. Zhang, K. Kawakami, J. Zhu, H. Li, J. Lei, and S. Tu. . Molecular characterization of multidrug- and extensively drug-resistant *Mycobacterium tuberculosis* strains in Jiangxi, China. . *JClinMicrobiol*. 2012; **50**: 2404-13.
34. Zhao M, Li X, Xu P, Shen X, Gui X, Wang L, et al. Transmission of MDR and XDR tuberculosis in Shanghai, China. *PLoS ONE*. 2009; **4**(2): e4370.

35. Sun Z, Chao Y, Zhang X, Zhang J, Li Y, Qiu Y, et al. Characterization of extensively drug-resistant *Mycobacterium tuberculosis* clinical isolates in China. *J Clin Microbiol.* 2008; **46**(12): 4075-7.
36. Surcouf C, Heng S, Pierre-Audigier C, Cadet-Daniel V, Namouchi A, Murray A, et al. Molecular detection of fluoroquinolone-resistance in multi-drug resistant tuberculosis in Cambodia suggests low association with XDR phenotypes. *BMC Infect Dis.* 2011; **11**: 255.
37. Hasan R, Jabeen K, Ali A, Rafiq Y, Laiq R, Malik B, et al. Extensively drug-resistant tuberculosis, Pakistan. *Emerg Infect Dis.* 2010; **16**(9): 1473-5.
38. Ali A, R. Hasan, K. Jabeen, N. Jabeen, E. Qadeer, and Z. Hasan. Characterization of mutations conferring extensive drug resistance to *Mycobacterium tuberculosis* isolates in Pakistan. . *Antimicrob Agents Chemother.* 2011; **55**: 5654-9.
39. Chang CW, Wu MH, Chuang PC, Jou R. Characteristics of multidrug-resistant *Mycobacterium tuberculosis* in Taiwan: a population-based study. *Infection, genetics and evolution : journal of molecular epidemiology and evolutionary genetics in infectious diseases.* 2011; **11**(3): 633-9.
40. Ajbani K, Rodrigues C, Shenai S, Mehta A. Mutation detection and accurate diagnosis of extensively drug-resistant tuberculosis: report from a tertiary care center in India. *J Clin Microbiol.* 2011; **49**(4): 1588-90.
41. Tamaru A, Nakajima C, Wada T, Wang Y, Inoue M, Kawahara R, et al. Dominant incidence of multidrug and extensively drug-resistant specific *Mycobacterium tuberculosis* clones in Osaka Prefecture, Japan. *PLoS One.* 2012; **7**(8): e42505.
42. Murase Y, Maeda S, Yamada H, Ohkado A, Chikamatsu K, Mizuno K, et al. Clonal expansion of multidrug-resistant and extensively drug-resistant tuberculosis, Japan. *Emerg Infect Dis.* 2010; **16**(6): 948-54.
43. Ano H, T. Matsumoto, T. Suetake, T. Nagai, Y. Tamura, I. Takamatsu, T. Iwasaki, H. Matsuoka, S. Sasada, S. Tetsumoto, I. Tsuyuguchi, Y. Kusunoki, and T. Takashima. .

Relationship between the isoniazid-resistant mutation katGS315T and the prevalence of MDR-/XDR-TB in Osaka, Japan. *IntJTubercLung Dis* 12. 2008: 1300-5.

44. Velayati A, Masjedi M, Farnia P, Tabarsi P, Ghanavei J, Ziazarifi A, et al. Emergence of New Forms of Totally Drug-Resistant Tuberculosis Bacilli: Super Extensively Drug-Resistant Tuberculosis or Totally Drug-Resistant Strains in Iran. *Chest*. 2009; **136(2)**: 420-5.

45. Masjedi MR, Farnia P, Sorooch S, Pooramiri MV, Mansoori SD, Zarifi AZ, et al. Extensively drug-resistant tuberculosis: 2 years of surveillance in Iran. *Clin Infect Dis*. 2006; **43(7)**: 841-7.

46. Cohen-Bacrie S, Ben Kahla I, Botelho-Nevers E, Million M, Parola P, Brouqui P, et al. Imported extensively drug-resistant Mycobacterium tuberculosis Beijing genotype, Marseilles, France, 2011. *Euro Surveill*. 2011; **16(16)**.

47. Perdigao J, Macedo R, Silva C, Machado D, Couto I, Viveiros M, et al. From multidrug-resistant to extensively drug-resistant tuberculosis in Lisbon, Portugal: the stepwise mode of resistance acquisition. *J Antimicrob Chemother*. 2013; **68(1)**: 27-33.

48. Perdigao J, Macedo R, Silva C, Pinto C, Furtado C, Brum L, et al. Tuberculosis drug-resistance in Lisbon, Portugal: a 6-year overview. *Clin Microbiol Infect*. 2011; **17(9)**: 1397-402.

49. Augustynowicz-Kopec E, Zwolska Z. [Tuberculosis caused by XDR resistant Mycobacterium tuberculosis in Poland. Microbiological and molecular analysis]. *Pneumonol Alergol Pol*. 2007; **75(1)**: 32-9.

50. Kozinska M, Brzostek A, Krawiecka D, Rybczynska M, Zwolska Z, Augustynowicz-Kopec E. [MDR, pre-XDR and XDR drug-resistant tuberculosis in Poland in 2000-2009]. *Pneumonol Alergol Pol*. 2011; **79(4)**: 278-87.
